# Supplementary material for: Trivalent lanthanide metal ions promote formation of stacking G-quartets
Source: Royal Society of Chemistry journal article supplement (doi:10.1039/b710299b), 2007-01-01
Supplement: b710299b.pdf [file b710299b.pdf]

## Electronic Supplementary Information

“Trivalent lanthanide metal ions promote formation of stacking G-quartets”

Irene C. M. Kwan, Yi-Min She, and Gang Wu\*

Department of Chemistry  
Queen's University  
Kingston, Ontario  
Canada K7L 3N6

FAX: 613 533 6669

Phone: 613 533 2644

E-mail: [gang.wu@chem.queensu.ca](mailto:gang.wu@chem.queensu.ca)

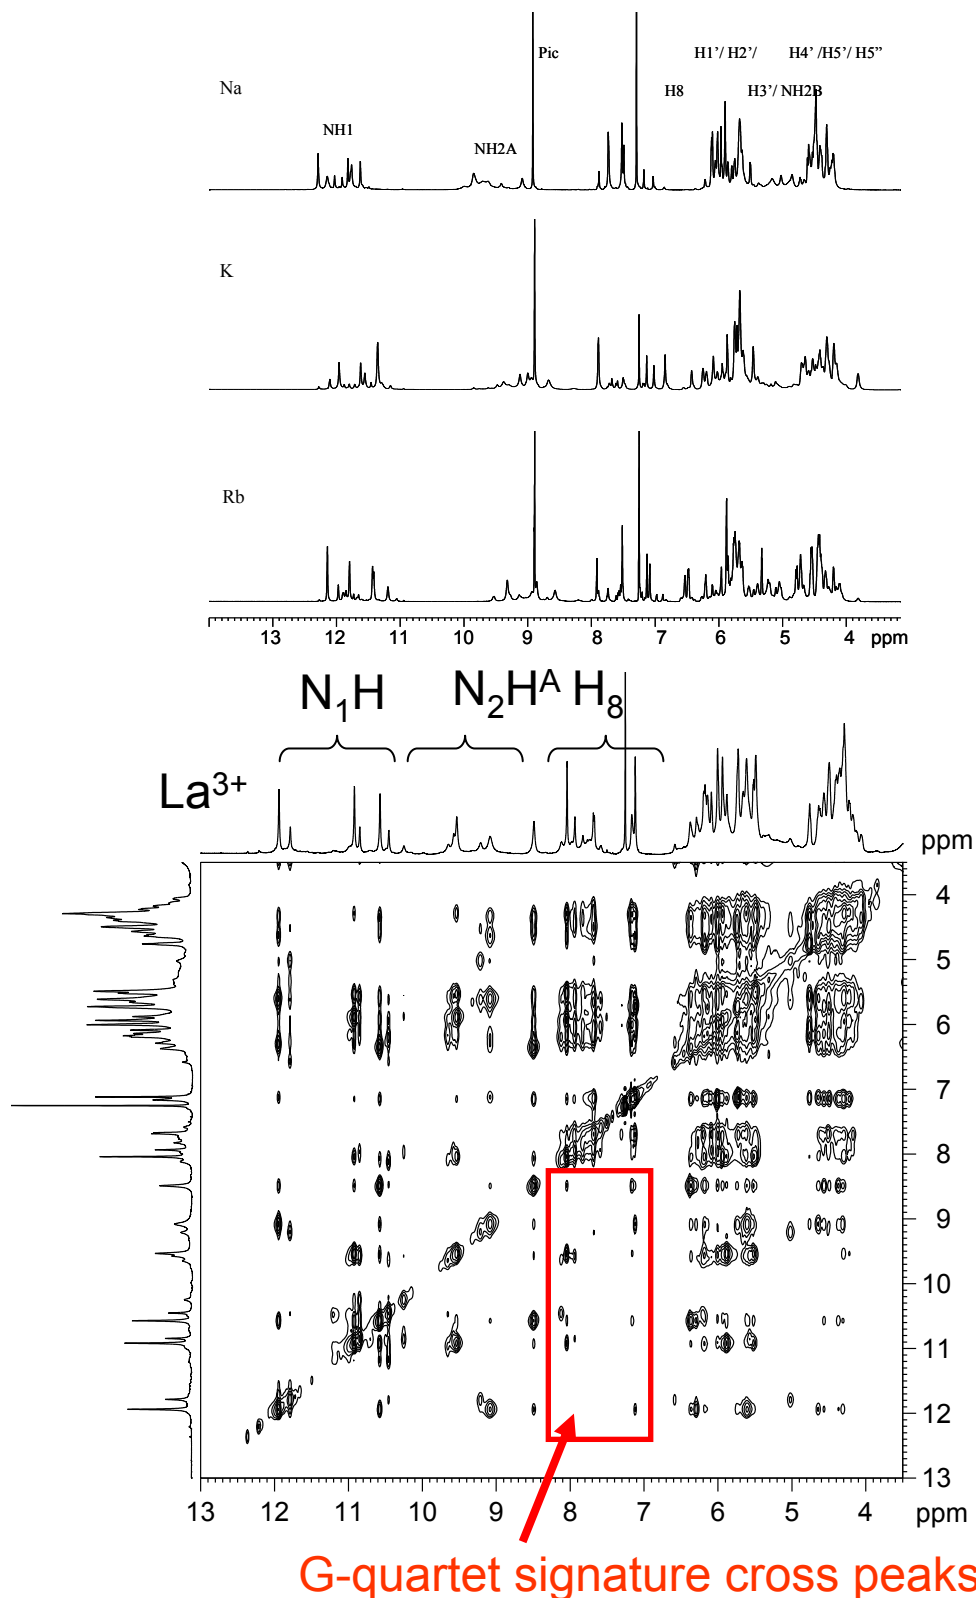

### G-quartet signature cross peaks

Figure 1S. (Top)  $^1\text{H}$  1D NMR spectra of Na<sup>+</sup>, K<sup>+</sup> and Rb<sup>+</sup> complexes of triacetylguanosine (G) in  $\text{CDCl}_3$ . (Bottom)  $^1\text{H}$  1D and 2D NOESY spectra of the G-La<sup>3+</sup> complex in  $\text{CDCl}_3$ . All solution-state NMR spectra were recorded on a Bruker Avance 600 MHz spectrometer and in  $\text{CDCl}_3$  at 268.2 K. For  $^1\text{H}$  NMR experiments, a pi-pulse of 20  $\mu\text{s}$  at a power level of 0 dB was used. Spectra were obtained at various temperatures achieved carefully by a Bruker BT-3000 unit. The 2D NOESY spectra were recorded at various temperatures using the pulse program NOESYGPPH (Bruker XWinNMR Version 3.5) with a mixing time of 400 ms. The experiments were performed using the phase-sensitive TPPI mode. The data were collected using a  $90^\circ$  pulse of 10.0  $\mu\text{s}$  and a relaxation delay of 2.0 s. Spectral width of 13,227 Hz in each dimension was employed. A total of 2 scans were collected for each time increment. Final data matrix was 2048 (F2) x 1024 (F1)

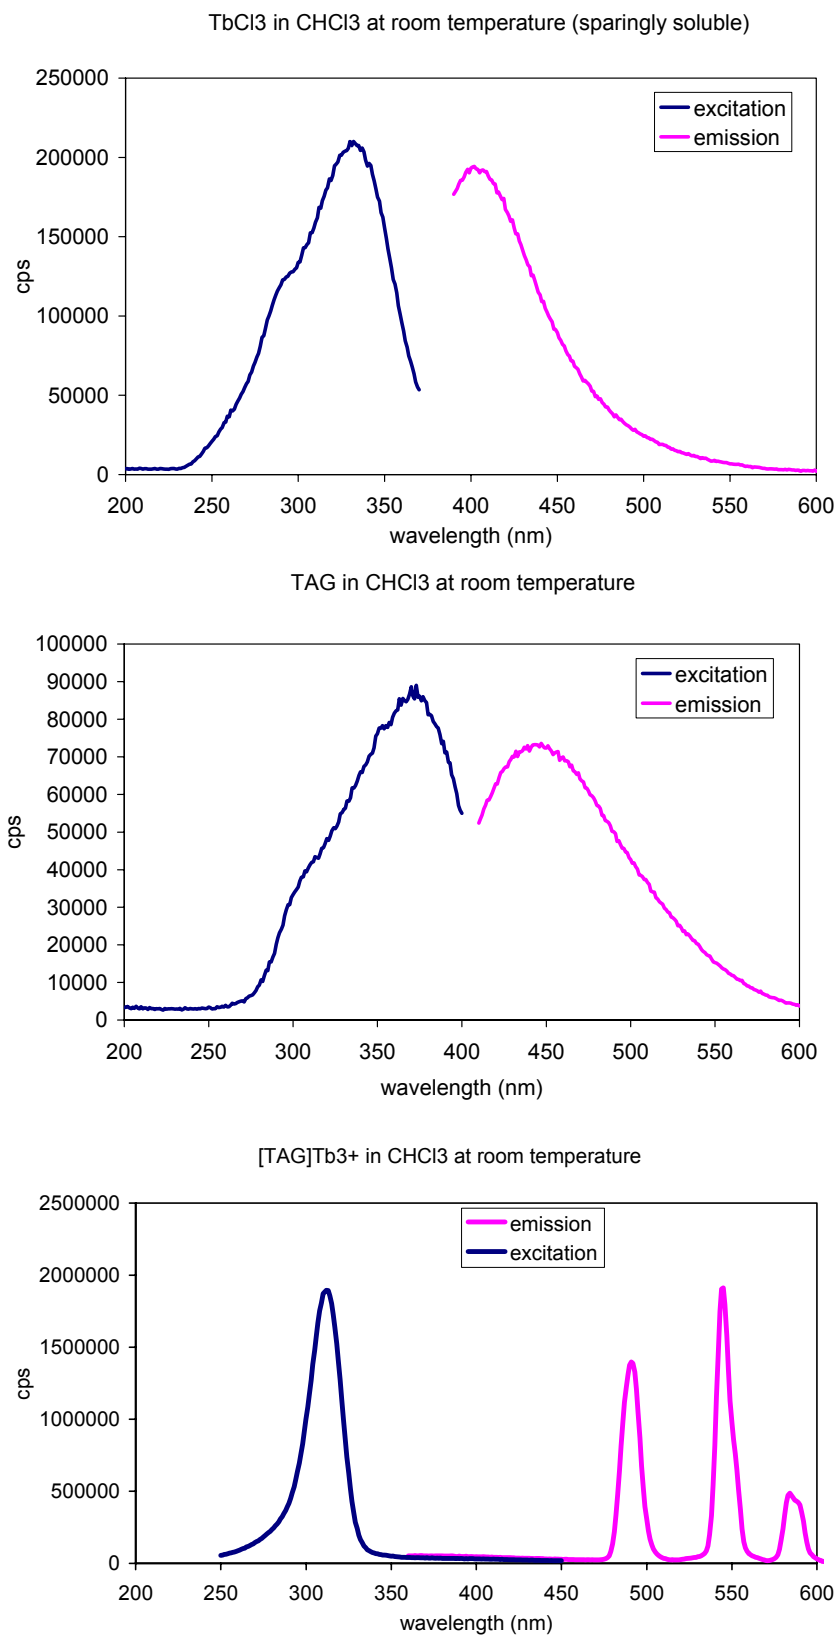

Figure 2S. Excitation and emission spectra of TbCl<sub>3</sub> (top), G (middle) and G-Tb complex (bottom) in CHCl<sub>3</sub> at room temperature.

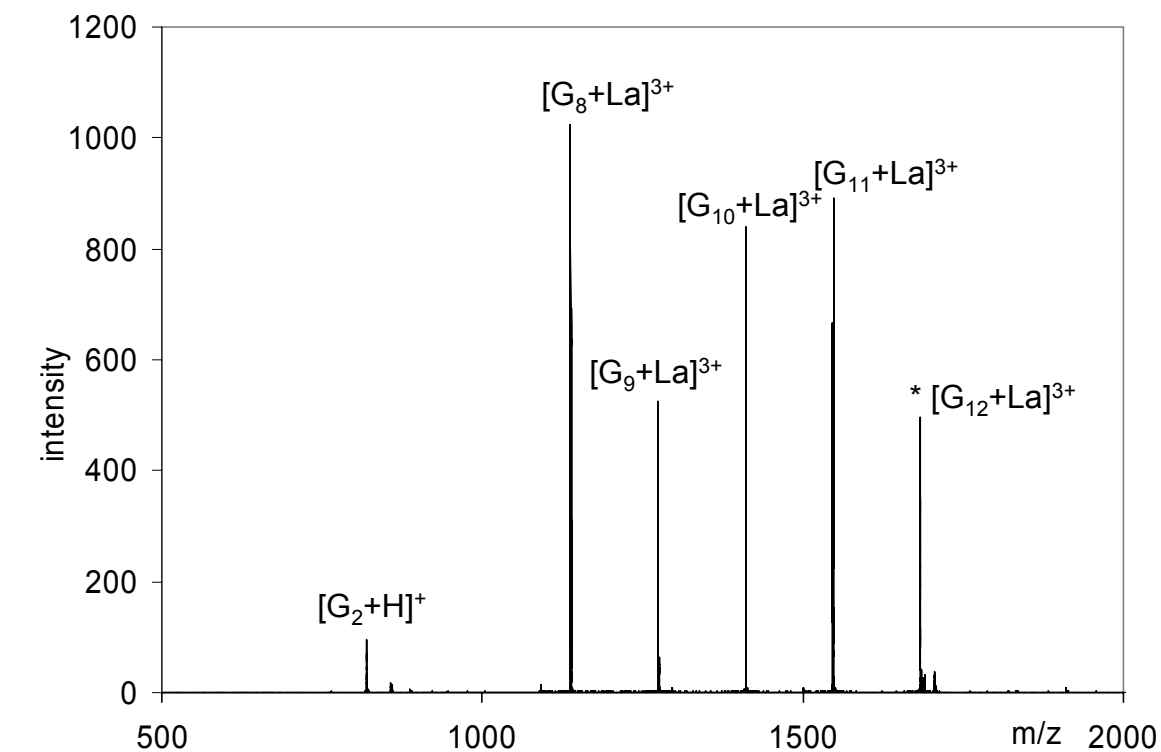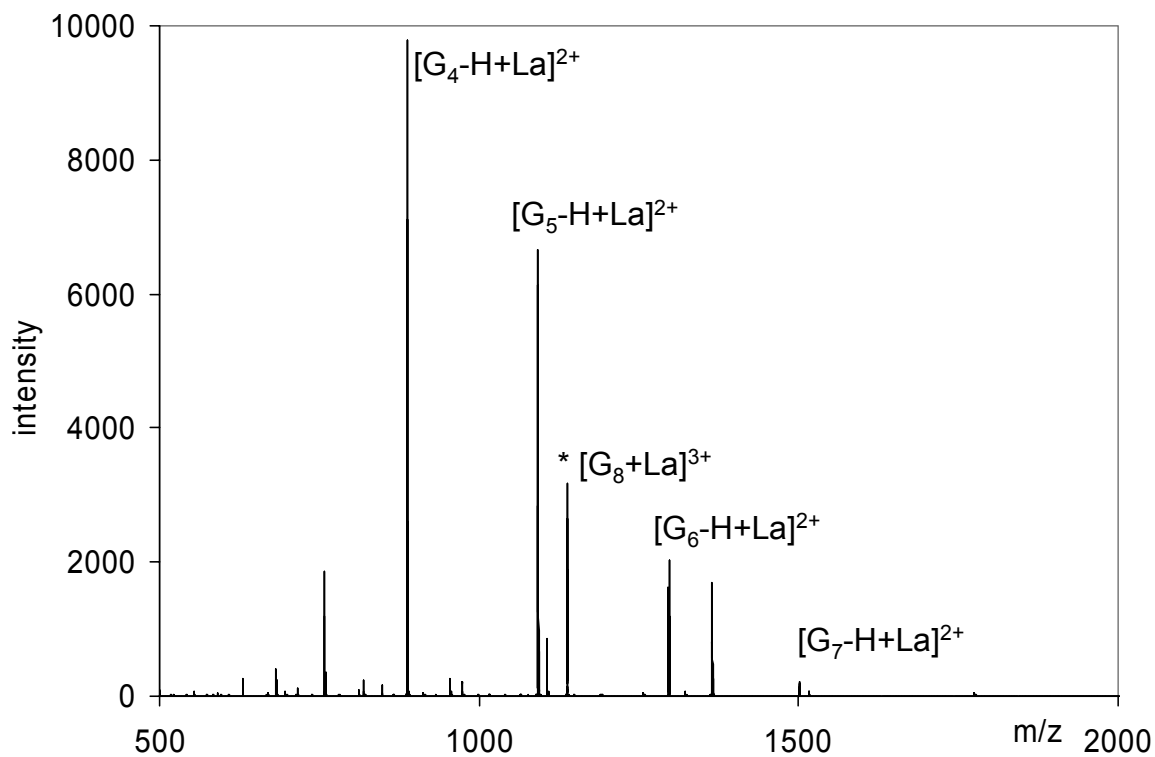

Figure 3S. ESI MS/MS spectra of the  $\text{La}^{3+}$  complex. The parent ion is marked by an asterisk \*.

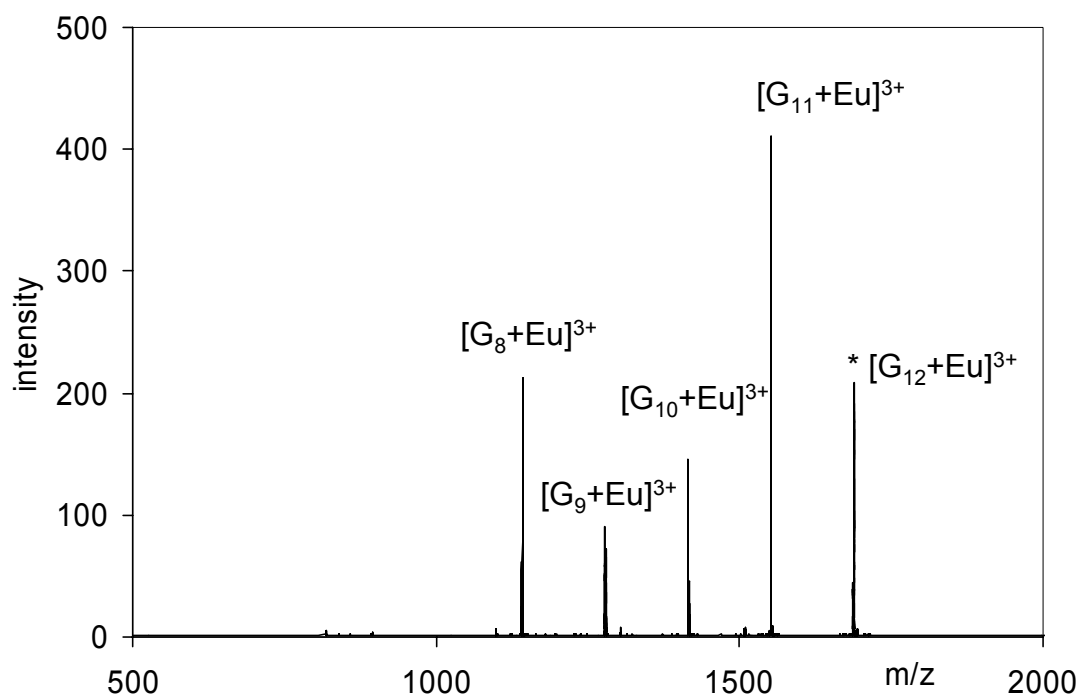

Figure 4S. ESI MS/MS spectra of the  $Eu^{3+}$  complex. The parent ion is marked by an asterisk \*.

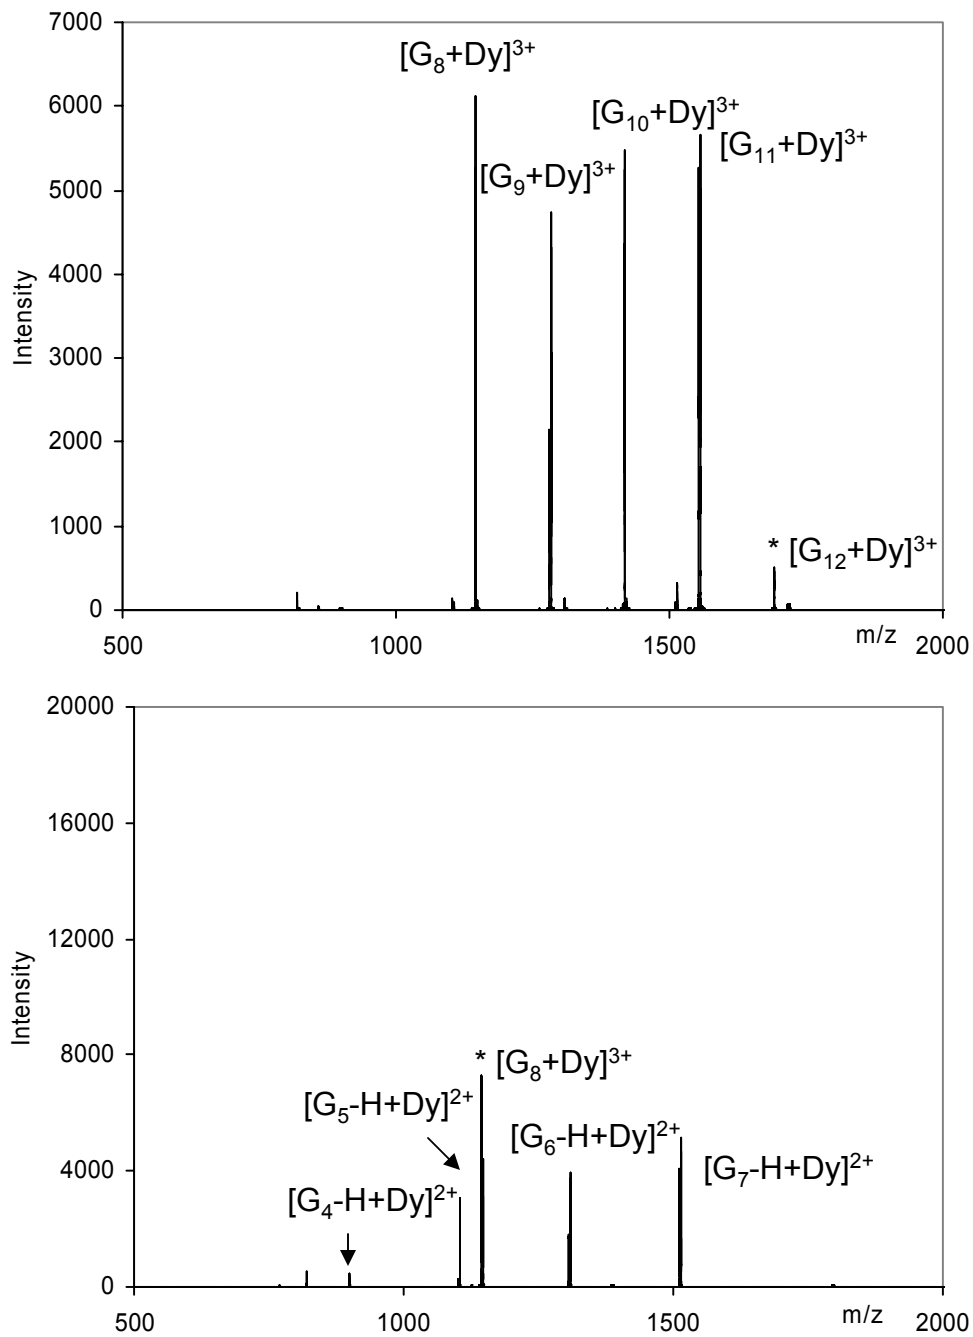

Figure 5S. ESI MS/MS spectra of the Dy<sup>3+</sup> complex. The parent ion is marked by an asterisk \*.

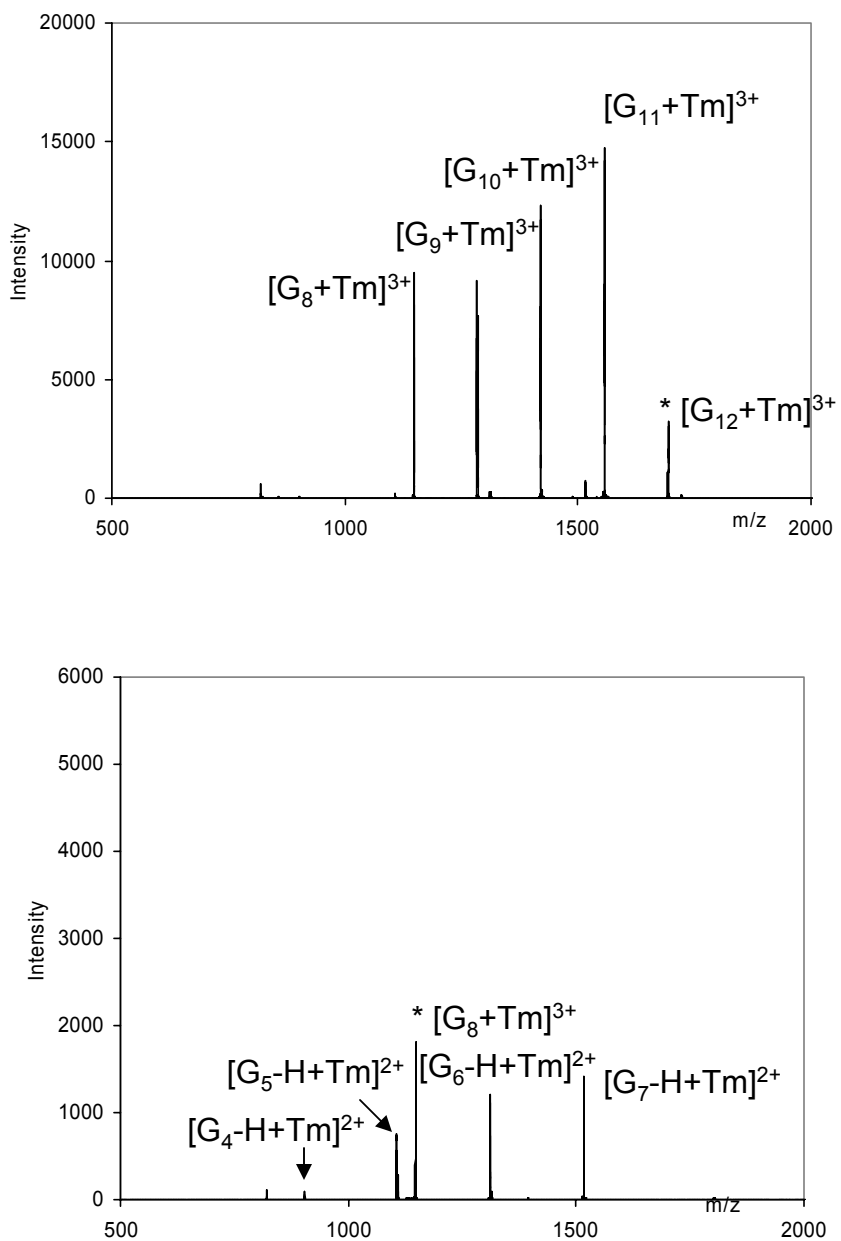

Figure 6S. ESI MS/MS spectra of the Tm<sup>3+</sup> complex. The parent ion is marked by an asterisk \*.
